## Antioxidant-induced modification of INrf2 cysteine 151 and PKC- $\delta$ -mediated phosphorylation of Nrf2 serine 40 are both required for stabilization and nuclear translocation of Nrf2 and increased drug resistance

Suryakant K. Niture, Abhinav K. Jain and Anil K. Jaiswal

*Journal of Cell Science* 123, 1969  
© 2010. Published by The Company of Biologists Ltd  
doi:10.1242/jcs.074286

There was an error published in *J. Cell Sci.* **122**, 4452-4464.

Fig. 9B was labeled incorrectly and the text referring to this figure is incorrect regarding the cell type used. Hepa-1 cells, and not MCF-7 cells, were used.

The authors apologize for this mistake.
